# Supplementary material for: The 12-LOX/12-HETE/GPR31 metabolic pathway promotes tumor-associated macrophage M2 polarization mediated pancreatic cancer development
Source: PeerJ journal article supplement (doi:10.7717/peerj.19963), 2025-10-06
Supplement: MIQE_checklist.xls [file MIQE_checklist.xls]

## Sheet: Sheet1
ITEM TO CHECK	IMPORTANCE	CHECKLIST
EXPERIMENTAL DESIGN
Definition of experimental and control groups	E	page6;line207-209,238-239
Number within each group	E	page3,line102-103
Assay carried out by core lab or investigator's lab?	D	NA
Acknowledgement of authors' contributions	D	NA
SAMPLE
Description	E	NA
Volume/mass of sample processed	D	NA
Microdissection or macrodissection	E	NA
Processing procedure	E	NA
If frozen - how and how quickly?	E	NA
If fixed - with what, how quickly?	E	NA
Sample storage conditions and duration (especially for FFPE samples)	E	NA
NUCLEIC ACID EXTRACTION
Procedure and/or instrumentation	E	page4, line133-137
Name of kit and details of any modifications	E	page4, line133-137
Source of additional reagents used	D	page4, line133-137
Details of DNase or RNAse treatment	E	page4, line133-137
Contamination assessment (DNA or RNA)	E	page4, line133-137
Nucleic acid quantification	E	page4, line133-137
Instrument and method	E	page4, line133-137
Purity (A260/A280)	D	page4, line133-137
Yield	D	page4, line133-137
RNA integrity method/instrument	E	page4, line133-137
RIN/RQI or Cq of 3' and 5' transcripts	E	page4, line133-137
Electrophoresis traces	D	page4, line133-137
Inhibition testing (Cq dilutions, spike or other)	E	page4, line133-137
REVERSE TRANSCRIPTION
Complete reaction conditions	E	page4, line133-137
Amount of RNA and reaction volume	E	page4, line133-137
Priming oligonucleotide (if using GSP) and concentration	E	page4, line133-137
Reverse transcriptase and concentration	E	page4, line133-137
Temperature and time	E	page4, line133-137
Manufacturer of reagents and catalogue numbers	D	page4, line133-137
Cqs with and without RT	D*	page4, line133-137
Storage conditions of cDNA	D	page4, line133-137
qPCR TARGET INFORMATION
If multiplex, efficiency and LOD of each assay.	E	page4, line133-137
Sequence accession number	E	page4, line133-137
Location of amplicon	D	page4, line133-137
Amplicon length	E	page4, line133-137
In silico specificity screen (BLAST, etc)	E	page4, line133-137
Pseudogenes, retropseudogenes or other homologs?	D	page4, line133-137
Sequence alignment	D	page4, line133-137
Secondary structure analysis of amplicon	D	page4, line133-137
Location of each primer by exon or intron (if applicable)	E	page4, line133-137
What splice variants are targeted?	E	page4, line133-137
qPCR OLIGONUCLEOTIDES
Primer sequences	E	page4, line133-137
RTPrimerDB Identification Number	D	page4, line133-137
Probe sequences	D**	page4, line133-137
Location and identity of any modifications	E	page4, line133-137
Manufacturer of oligonucleotides	D	page4, line133-137
Purification method	D	page4, line133-137
qPCR PROTOCOL
Complete reaction conditions	E	Yes
Reaction volume and amount of cDNA/DNA	E	Yes
Primer, (probe), Mg++ and dNTP concentrations	E	Yes
Polymerase identity and concentration	E	Yes
Buffer/kit identity and manufacturer	E	Yes
Exact chemical constitution of the buffer	D	Yes
Additives (SYBR Green I, DMSO, etc.)	E	Yes
Manufacturer of plates/tubes and catalog number	D	Yes
Complete thermocycling parameters	E	Yes
Reaction setup (manual/robotic)	D	Yes
Manufacturer of qPCR instrument	E	Yes
qPCR VALIDATION
Evidence of optimisation (from gradients)	D	Yes
Specificity (gel, sequence, melt, or digest)	E	Yes
For SYBR Green I, Cq of the NTC	E	Yes
Standard curves with slope and y-intercept	E	Yes
PCR efficiency calculated from slope	E	Yes
Confidence interval for PCR efficiency or standard error	D	Yes
r2 of standard curve	E	Yes
Linear dynamic range	E	Yes
Cq variation at lower limit	E	Yes
Confidence intervals throughout range	D	Yes
Evidence for limit of detection	E	Yes
If multiplex, efficiency and LOD of each assay.	E	Yes
DATA ANALYSIS
qPCR analysis program (source, version)	E	Yes
Cq method determination	E	Yes
Outlier identification and disposition	E	Yes
Results of NTCs	E	Yes
Justification of number and choice of reference genes	E	Yes
Description of normalisation method	E	Yes
Number and concordance of biological replicates	D	Yes
Number and stage (RT or qPCR) of technical replicates	E	Yes
Repeatability (intra-assay variation)	E	Yes
Reproducibility (inter-assay variation, %CV)	D	Yes
Power analysis	D	Yes
Statistical methods for result significance	E	Yes
Software (source, version)	E	Yes
Cq or raw data submission using RDML	D	Yes
Table 1. MIQE checklist for authors, reviewers and editors. All essential information (E) must be submitted with the manuscript. Desirable
information (D) should be submitted if available. If using primers obtained from RTPrimerDB, information on qPCR target, oligonucleotides,
protocols and validation is available from that source.
*: Assessing the absence of DNA using a no RT assay is essential when first extracting RNA. Once the sample has been validated as
RDNA-free, inclusion of a no-RT control is desirable, but no longer essential.
**: Disclosure of the probe sequence is highly desirable and strongly encouraged. However, since not all commercial pre-designed assay
vendors provide this information, it cannot be an essential requirement. Use of such assays is advised against.
