# Supplementary material for: The 12-LOX/12-HETE/GPR31 metabolic pathway promotes tumor-associated macrophage M2 polarization mediated pancreatic cancer development
Source: PeerJ journal article supplement (doi:10.7717/peerj.19963), 2025-10-06
Supplement: raw_data.xlsx [file raw_data.xlsx]

## Sheet: figure 1B
group	N	T
12-LOX	46.2566	100.622
	50.6217	96.7857
	57.7646	90.7011

## Sheet: figure 1C
group	P	T
Intden	540124	682905
	103530	670130
	786225	703876

## Sheet: figure 1D
group	Normal	PDAC	P	T
12-HETE	242.549	300.322	507.817	753.063
	235.556	299.289	572.564	641.36
	222.599	296.88	506.612	747.05
	268.518	294.521	573.294	806.739
	267.341	291.882	468.889	629.785
	277.011	290.842	465.313	617.797
	276.011	287.496
	271.564	285.732
	268.864	285.647

## Sheet: figure 2C
days	Tumor volume（mm3)
	Vehicle												ML355
0	0	0	0	0	0	0	0	0	0	0	0	0	0	0	0	0	0	0	0	0	0	0	0	0
5	0.785	3.14	0.785	2.09333	0.523333	1.04667	2.09333	1.04667	0.523333	1.04667	1.04667	4.71	0.523333	0.523333	2.09333	2.09333	4.71	2.09333	1.04667	2.512	2.09333	0.523333	1.04667	3.14
15	0.785	3.925	1.30833	8.37333	6.28	8.37333	2.09333	4.18667	6.28	4.71	10.4667	4.71	0.785	2.09333	3.27083	6.28	3.14	2.09333	8.37333	6.28	3.14	6.28	6.28	4.18667
20	20.2296	27.5705	45.3727	33	47	22	45	38	51	58	37.68	37.68	6.27822	21.4776	37.2322	23.55	25.12	28.26	26	42	34	28	31	23
25	96.4935	104.472	190.148	94.8385	127.275	88.9557	152.342	138.788	181.139	157.945	121.874	127.905	59.4182	123.557	130.731	104.771	78.4686	98.3239	99.348	153.895	109.429	72.7852	90.7711	80.6195
30	246.687	219.453	289.483	183.376	214.776	109.9	231.816	176.036	287	266	198	193	123.486	112.186	129.013	123.779	121.989	171.444	130.561	224.782	173	143	162	121
35	241.749	296.262	537.188	362.67	362.67	131.88	235.5	234.453	336.721	301.154	228.697	228.328	179.147	138.191	85.5477	125.6	146.533	209.333	153.86	234.453	195.333	161.538	189.336	137.457

## Sheet: figure 3A
group	Vehicle	ML355
IntDen	2.05094e+06	969218
	1.25806e+06	951581
	1.87039e+06	772493
	1.66685e+06	975422
	1.82173e+06	559921
	1.02471e+06	673769

## Sheet: figure 3B
	12-HETE
group	Vehicle						ML355
Serum	921.956	899.383	928.611	913.336	914.421	920.452	637.095	599.279	615.237	644.116	646.251	646.999
Tumor	464.968	461.161	677.557	633.528	628.982	662.852	446.434	445.942	424.713	385.898	378.941	410.99

## Sheet: figure 3D
	Vehicle	ML355
f4/80+cd11b+	12.44 %	35.29 %
	12.33 %	33.53 %
	13.08 %	30.80 %
cd86+	0.85 %	22.46 %
	0.68 %	22.82 %
	0.61 %	22.67 %
cd206+	29.44 %	17.25 %
	29.01 %	25.81 %
	29.42 %	23.16 %

## Sheet: figure 3E
		IL-12A		TNF-α		NOS2		TGF-β		ARG-1		FIZZ-1
group	sample	IL-12A Cq value	Actin Cq value	TNF-α Cq value	Actin Cq value	NOS2 Cq value	Actin Cq value	TGF-β Cq value	Actin Cq value	ARG-1 Cq value	Actin Cq value	FIZZ-1 Cq value	Actin Cq value
Vehicle	1	29.52	15.18	31.8967	17.618	21.9	15.18	21.61	15.18	24.1452	14.628	28.3932	17.618
		29.71	15.57	31.3678	17.5104	22.04	15.57	21.68	15.57	24.0396	14.7048	28.7148	17.5104
		29.1	15.59	31.6563	17.4271	21.84	15.59	21.76	15.59	23.8746	14.7469	28.6634	17.4271
	2	27.66	13.17	31.2692	17.3018	22.81	16.3	22.76	16.3	23.9242	14.79	25.5532	17.4049
		27.71	13.6	31.2062	17.171	22.88	16.13	22.36	16.13	24.0245	14.7445	25.6702	17.329
		27.61	13.64	31.1432	17.2316	22.72	16.6	22.2	16.6	23.9743	14.8354	25.6405	17.2463
	3	31.1	17.52	31.8879	17.9702	21.7	14.75	20.7079	14.628	26.8	17.52	27.2674	17.9702
		31.32	17.71	32.3299	17.808	21.53	14.75	20.7763	14.7048	26.69	17.71	27.3777	17.808
		31.55	17.76	31.8768	17.8788	21.55	14.63	20.7057	14.7469	26.9	17.76	27.6068	17.8788
	4	31.14	17.32	31.6141	18.3928	19.66	13.17	20.8665	14.79	26.99	17.32	29.3844	18.3928
		30.78	17.45	32.1552	18.443	19.83	13.6	20.7507	14.7445	26.77	17.45	29.548	18.443
		30.96	17.63	31.8684	18.2205	19.74	13.64	20.784	14.8354	26.68	17.63	29.7175	18.2205
	5	32.52	18.78	37.59	14.67	22.57	15.69	22.75	15.71	28.37	18.78	28.67	17.29
		32.5	18.85	37.6	14.88	22.67	15.69	22.6	15.73	28.31	18.85	28.51	17.37
		32.86	19.01	37.6	14.99	22.67	15.64	22.76	15.75	28.43	19.01	28.64	17.54
	6	30.51	16.88	38.77	14.73	23.46	16.53	22.23	15.09	26.13	16.88	28.22	17.59
		30.55	17.07	38.57	15.11	23.34	16.45	22.41	15.26	26.11	17.07	28.4	17.42
		30.51	17.21	38.98	15.06	23.23	16.54	22.18	15.16	26.2	17.21	28.68	17.45
ML355	7	29.41	15.32	34.1209	20.9356	21.95	15.32	22.55	15.32	26.61	15.32	29.9571	17.8659
		30.02	15.54	33.7319	20.9874	22.17	15.54	22.4	15.54	26.46	15.54	30.2391	17.8803
		29.64	15.33	34.1888	20.9358	21.89	15.33	22.47	15.33	26.82	15.33	30.2157	18.08
	8	28.4	14.92	30.6301	17.8659	21.16	14.92	22.4	14.92	27.16	14.92	27.2891	18.2676
		28.65	14.92	31.286	17.8803	21.72	14.92	22.47	14.92	25.62	14.92	27.4635	18.3189
		28.65	14.73	31.1832	18.08	21.72	14.73	22.43	14.73	26.39	14.73	27.5744	18.0448
	9	27.11	13.74	37.0588	18.2676	21.06	14.68	21.4641	14.2037	25.1842	13.7299	29.9134	17.7632
		27.38	13.76	36.4353	18.3189	21.09	14.47	21.5545	14.1602	25.0901	13.4979	30.0187	17.8996
		26.93	13.72	36.0454	18.0448	21.18	14.61	21.5584	13.9032	25.1704	13.5852	29.9096	17.602
	10	27.34	13.6	30.8521	17.7632	20.4	13.74	23.75	16.13	24.398	14.2037	33.848	18.2328
		27.4	13.77	30.7564	17.8996	20.79	13.76	23.7	16.16	24.4172	14.1602	34.2059	18.2422
		27.61	13.73	30.938	17.602	20.64	13.72	23.62	16.09	24.6797	13.9032	34.0986	18.2233
	11	30.92	17.43	31.9764	18.2328	22.97	15.46	23.16	15.46	27.36	17.43	32.09	17.76
		31.01	17.57	32.2256	18.2422	23.01	15.68	23.01	15.68	27.26	17.57	31.93	17.78
		31.1	17.6	31.7272	18.2233	22.99	15.58	22.9	15.58	27.45	17.6	32.37	17.71
	12	31.71	17.16	37.88	17.78	24.47	17	23.02	15.49	28.26	17.16	36.41	18.23
		31.89	17.54	38.13	17.64	24.48	17.11	23.01	15.47	28.35	17.54	36.46	18.06
		31.8	17.51	38	17.68	24.64	17.06	22.91	15.49	28.25	17.51	36.52	18.12

## Sheet: figure 4A
group	sample		count	EDU positive cells(%)	average
PC	1	1-edu	81	22.2527	17.0229
		1-hoechst	364
		2-edu	42	12.3894
		2-hoechst	339
		3-edu	57	16.4265
		3-hoechst	347
	2	1-edu	58	23.8683	22.5998
		1-hoechst	243
		2-edu	48	19.8347
		2-hoechst	242
		3-edu	60	24.0964
		3-hoechst	249
	3	1-edu	57	29.3814	23.7239
		1-hoechst	194
		2-edu	42	17.0732
		2-hoechst	246
		3-edu	53	26.5
		3-hoechst	200
PC+ML355	1	1-edu	52	21.9409	19.8786
		1-hoechst	237
		2-edu	41	22.7778
		2-hoechst	180
		3-edu	27	14.9171
		3-hoechst	181
	2	1-edu	65	30.9524	29.3865
		1-hoechst	210
		2-edu	54	31.5789
		2-hoechst	171
		3-edu	51	25.6281
		3-hoechst	199
	3	1-edu	45	14.7541	14.5693
		1-hoechst	305
		2-edu	57	15.0794
		2-hoechst	378
		3-edu	53	13.8743
		3-hoechst	382
PC+M0	1	1-edu	160	54.7945	52.6334
		1-hoechst	292
		2-edu	208	51.1057
		2-hoechst	407
		3-edu	208	52
		3-hoechst	400
	2	1-edu	212	46.4912	47.0508
		1-hoechst	456
		2-edu	287	52.8545
		2-hoechst	543
		3-edu	199	41.8067
		3-hoechst	476
	3	1-edu	440	55.7668	55.4809
		1-hoechst	789
		2-edu	345	55.5556
		2-hoechst	621
		3-edu	366	55.1205
		3-hoechst	664
PC+M0+ML355	1	1-edu	270	48.3871	44.8576
		1-hoechst	558
		2-edu	261	38.6095
		2-hoechst	676
		3-edu	265	47.5763
		3-hoechst	557
	2	1-edu	252	42.2111	38.4414
		1-hoechst	597
		2-edu	241	35.9701
		2-hoechst	670
		3-edu	208	37.1429
		3-hoechst	560
	3	1-edu	244	47.5634	39.0754
		1-hoechst	513
		2-edu	197	36.2799
		2-hoechst	543
		3-edu	225	33.3828
		3-hoechst	674

## Sheet: figure 4B
	group	sample	name	count
Migration	PC	1	1	51	44
			2	55
			3	43
			4	31
			5	40
		2	1	112	79.6
			2	107
			3	69
			4	41
			5	69
		3	1	102	83
			2	104
			3	80
			4	64
			5	65
	PC+ML355	1	1	79	75
			2	81
			3	83
			4	60
			5	72
		2	1	65	79.6
			2	72
			3	84
			4	85
			5	92
		3	1	40	50.2
			2	68
			3	50
			4	58
			5	35
	PC+M0	1	1	197	215.2
			2	216
			3	219
			4	217
			5	227
		2	1	260	253.6
			2	261
			3	251
			4	234
			5	262
		3	1	294	294.8
			2	282
			3	298
			4	309
			5	291
	PC+M0+ML355	1	1	150	125.8
			2	116
			3	148
			4	92
			5	123
		2	1	138	162.2
			2	160
			3	203
			4	162
			5	148
		3	1	170	192.6
			2	172
			3	236
			4	208
			5	177
Invasion	PC	1	1	77	76.3333
			2	72
			3	80
		2	1	54	65.3333
			2	80
			3	62
		3	1	65	63.3333
			2	73
			3	52
	PC+ML355	1	1	76	65.3333
			2	61
			3	59
		2	1	66	68.3333
			2	67
			3	72
		3	1	78	71
			2	67
			3	68
	PC+M0	1	1	133	133.667
			2	125
			3	143
		2	1	143	146.667
			2	156
			3	141
		3	1	157	160.333
			2	158
			3	166
	PC+M0+ML355	1	1	125	122.667
			2	119
			3	124
		2	1	89	100
			2	103
			3	108
		3	1	109	99
			2	91
			3	97

[truncated: 2 more sheets: figure 4C, figure 4D]
