# Supplementary material for: The 12-LOX/12-HETE/GPR31 metabolic pathway promotes tumor-associated macrophage M2 polarization mediated pancreatic cancer development
Source: PeerJ journal article supplement (doi:10.7717/peerj.19963), 2025-10-06
Supplement: Supplementary_raw_data.xlsx [file Supplementary_raw_data.xlsx]

## Sheet: Fig3D
Vehicle	ML355
70.6986	59.3214
62.7146	53.7325
67.505	51.3373

## Sheet: FigS1A
	12-LOX	ACTIN
si-12-LOX-1	32.7	31.26
si-12-LOX-1	33.2	31.44
si-12-LOX-1	33.37	31.74
si-12-LOX-2	32.71	31.62
si-12-LOX-2	33.01	31.86
si-12-LOX-2	33.31	31.77
si-12-LOX-3	31.42	31.93
si-12-LOX-3	32.77	32.24
si-12-LOX-3	32.09	32.09
control	29.66	31.83
control	29.94	31.53
control	29.2	32.13
si-12-LOX-1	32.81	31.15
si-12-LOX-1	32.55	31.63
si-12-LOX-1	33.2	31.62
si-12-LOX-2	33.14	31.6
si-12-LOX-2	33.02	31.55
si-12-LOX-2	32.96	31.94
si-12-LOX-3	32.62	31.84
si-12-LOX-3	32.87	32.17
si-12-LOX-3	32.94	31.96
control	29.33	31.87
control	29.81	31.41
control	29.41	31.91
si-12-LOX-1	33.13	31.52
si-12-LOX-1	33.17	31.29
si-12-LOX-1	32.87	31.68
si-12-LOX-2	33.21	31.82
si-12-LOX-2	32.87	31.27
si-12-LOX-2	33.14	31.34
si-12-LOX-3	32.65	32.07
si-12-LOX-3	32.73	32.19
si-12-LOX-3	32.51	32.23
control	29.95	31.24
control	30.16	31.87
control	29.64	31.46

## Sheet: FigS1C
PCsi12-LOX+M0	PCsi12-LOX+M0+ML355
6.28	6.27
6.56	8.67
5.85	5.54
